# Supplementary material for: Formation, Characterization, and Bonding of cis- and trans-[PtCl2{Te(CH2)6}2], cis-trans-[Pt3Cl6{Te(CH2)6}4], and cis-trans-[Pt4Cl8{Te(CH2)6}4]: Experimental and DFT Study
Source: MDPI journal article supplement (doi:10.3390/molecules28227551), 2023-11-12
Supplement: s1 [file s1]

# Formation, Characterization, and Bonding of *cis*- and *trans*-[PtCl<sub>2</sub>{Te(CH<sub>2</sub>)<sub>6</sub>}<sub>2</sub>], *cis-trans*-[Pt<sub>3</sub>Cl<sub>6</sub>{Te(CH<sub>2</sub>)<sub>6</sub>}<sub>4</sub>], and *cis-trans*-[Pt<sub>4</sub>Cl<sub>8</sub>{Te(CH<sub>2</sub>)<sub>6</sub>}<sub>4</sub>]: Experimental and DFT Study <sup>†</sup>

Marko Rodewald <sup>1,‡</sup>, J. Mikko Rautiainen <sup>2</sup>, Helmar Görls <sup>1</sup>, Raija Oilunkaniemi <sup>3</sup>, Wolfgang Weigand <sup>1,\*</sup> and Risto S. Laitinen <sup>3,\*</sup>

<sup>1</sup> Institute for Inorganic and Analytical Chemistry, Friedrich Schiller University of Jena, Humboldt Str. 8, 07743 Jena, Germany; marko.rodewald@uni-jena.de (M.R.); helmar.goerls@uni-jena.de (H.G.)

<sup>2</sup> Department of Chemistry and Nanoscience Center, University of Jyväskylä, P.O. Box 35, 40014 Jyväskylä, Finland; j.mikko.rautiainen@ju.fi

<sup>3</sup> Laboratory of Inorganic Chemistry, Environmental and Chemical Engineering, University of Oulu, P.O. Box 3000, 90014 Oulu, Finland; raija.oilunkaniemi@oulu.fi

\* Correspondence: wolfgang.weigand@uni-jena.de (W.W.); risto.laitinen@oulu.fi (R.S.L.)

<sup>†</sup> Dedicated to Professor J. Derek Woollins on the occasion of his retirement.

<sup>‡</sup> Current address: Leibniz Institute of Photonic Technology, Member of Leibniz Health Technologies, Member of the Leibniz Centre for Photonics in Infection Research (LPI), P.O. Box 100239, 07702 Jena, Germany.

## Supporting Information

### 1. NMR spectroscopy

#### 1.1 <sup>1</sup>H NMR Spectra of the mixture of *cis*- and *trans*-[PtCl<sub>2</sub>{Te(CH<sub>2</sub>)<sub>6</sub>}<sub>2</sub>]

**Figure 1S.** <sup>1</sup>H NMR spectra of the mixture of *cis*- and *trans*-[PtCl<sub>2</sub>{Te(CH<sub>2</sub>)<sub>6</sub>}<sub>2</sub>] (a) 30 s and (b) 1.2 h after the dissolution of *cis*-[PtCl<sub>2</sub>{Te(CH<sub>2</sub>)<sub>6</sub>}<sub>2</sub>].

**Figure 2S.** Fluxionality of the Te(CH<sub>2</sub>)<sub>6</sub> ligand in *cis*- and *trans*-[PtCl<sub>2</sub>{Te(CH<sub>2</sub>)<sub>6</sub>}<sub>2</sub>].

#### 1.2 <sup>125</sup>Te{<sup>1</sup>H} and <sup>195</sup>Pt{<sup>1</sup>H} NMR Spectra of the reaction mixture of *cis*-[PtCl<sub>2</sub>(NCPh)<sub>2</sub>] and Te(CH<sub>2</sub>)<sub>6</sub>

**Figure 3S.** (a) The <sup>125</sup>Te{<sup>1</sup>H} NMR and (b) the <sup>195</sup>Pt{<sup>1</sup>H} NMR spectra from the reaction solution of *cis*-[PtCl<sub>2</sub>(NCPh)<sub>2</sub>] and Te(CH<sub>2</sub>)<sub>6</sub>.

### 2. X-ray crystallography

**Table 1S.** Crystal data and refinement details for the X-ray structure determinations of *cis*-[PtCl<sub>2</sub>{Te(CH<sub>2</sub>)<sub>6</sub>}<sub>2</sub>] (**1<sub>cis</sub>**), *cis-trans*-[Pt<sub>3</sub>Cl<sub>6</sub>{Te(CH<sub>2</sub>)<sub>6</sub>}<sub>4</sub>] · 1¼CH<sub>2</sub>Cl<sub>2</sub> (**2** · 1¼CH<sub>2</sub>Cl<sub>2</sub>), *cis-trans*-[Pt<sub>4</sub>Cl<sub>8</sub>{Te(CH<sub>2</sub>)<sub>6</sub>}<sub>4</sub>] · 4CDCl<sub>3</sub> (**3** · 4CDCl<sub>3</sub>), and [PtCl<sub>2</sub>{S(O)(CD<sub>3</sub>)<sub>2</sub>}{Te(CH<sub>2</sub>)<sub>6</sub>}] (**4**).

**Table 2S.** Selected bond lengths (Å) and angles (°) in *cis-trans*-[Pt<sub>3</sub>Cl<sub>6</sub>{Te(CH<sub>2</sub>)<sub>6</sub>}<sub>4</sub>] · 1¼CH<sub>2</sub>Cl<sub>2</sub> (**2** · 1¼CH<sub>2</sub>Cl<sub>2</sub>) and *cis-trans*-[Pt<sub>4</sub>Cl<sub>8</sub>{Te(CH<sub>2</sub>)<sub>6</sub>}<sub>4</sub>] · 4CDCl<sub>3</sub> (**3** · 4CDCl<sub>3</sub>).

### 3. DFT Computations

#### 3.1 Optimum geometries

**Table 3S.** Atomic coordinates (Å) of the PBE0-D3/def2-TZVP optimized species discussed in this contribution.

**Table 4S.** PBE0-D3/def2-TZVP optimized geometries of the [Pt<sub>n</sub>Cl<sub>2n</sub>{Te(CH<sub>2</sub>)<sub>6</sub>}<sub>m</sub>] (*n* = 1-4; *m* = 2-4).

**Table 5S.** Total energies of optimized species at PBE0-D3/def2-TZVP level of theory in vacuum (Hartree).

**Table 6S.** Total energies of optimized species at PBE0-D3/def2-TZVP level of theory in dichloromethane (Hartree).

### 3.2 Secondary bonding interactions

**Figure 4S.** The Pt...Pt interactions result in the square-planar coordination plane to become slightly concave in (a) **1<sub>cis</sub>**, (b) **2**, and (c) **3**.

### 3.3 Formation energetics

**Table 7S.** Gibbs formation energies calculated at PBE0-D3/def2-TZVP level of theory (kJ mol<sup>-1</sup>) in dichloromethane.

## 1. NMR spectroscopy

### 1.1 $^1\text{H}$ NMR spectra of the mixture of *cis*- and *trans*-[PtCl<sub>2</sub>{Te(CH<sub>2</sub>)<sub>6</sub>}<sub>2</sub>]

The  $^1\text{H}$  spectra of the mixture of *cis*- and *trans*-[PtCl<sub>2</sub>{Te(CH<sub>2</sub>)<sub>6</sub>}<sub>2</sub>] has been shown in Figure 1S both after 30 s and 1.2 h after the dissolution of *cis*-[PtCl<sub>2</sub>{Te(CH<sub>2</sub>)<sub>6</sub>}<sub>2</sub>]. The multiplets were assigned to the *cis*- and *trans*-form based on relative intensities.

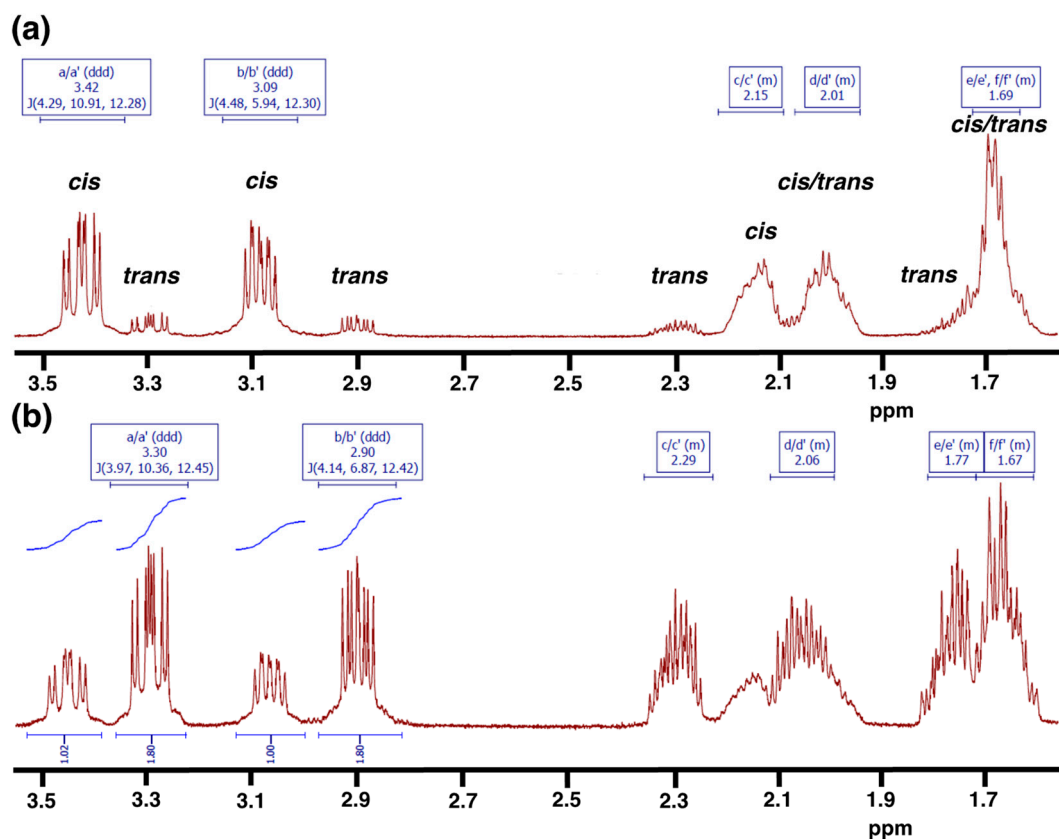

**Figure S1.**  $^1\text{H}$  NMR spectra of the mixture of *cis*- and *trans*-[PtCl<sub>2</sub>{Te(CH<sub>2</sub>)<sub>6</sub>}<sub>2</sub>] (a) 30 s and (b) 1.2 h after the dissolution of *cis*-[PtCl<sub>2</sub>{Te(CH<sub>2</sub>)<sub>6</sub>}<sub>2</sub>].

The  $^1\text{H}$  NMR spectra of both species exhibit very complex multiplets. Since tellurium donates its *np* lone pair to the Pt-Te bond, the C-Te-C plane will be approximately perpendicular to this bond. The Te(CH<sub>2</sub>)<sub>6</sub> ring is fluxional interconverting between two conformations, appearing planar in the NMR time scale (see Figure 2S). Therefore, the protons on the side of the ring pointing towards the platinum center in Te(CH<sub>2</sub>)<sub>6</sub> aren't chemically equivalent to the ones pointing away from the metal center giving rise to a complicated [AA'BB'CC'DD'EE'FF'] spin system. In case of the free ligand, significantly simpler [ABC]<sub>4</sub> spin system is observed [1].

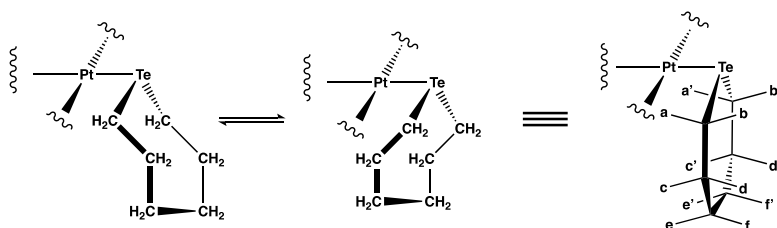

**Figure 2S.** Fluxionality of the Te(CH<sub>2</sub>)<sub>6</sub> ligand in *cis*- and *trans*-[PtCl<sub>2</sub>{Te(CH<sub>2</sub>)<sub>6</sub>}<sub>2</sub>].

The chemical shifts of the geminal methylene protons closest to tellurium lie at lowest field and are sufficiently different for the second order effects to play only a minor role, which can therefore be ignored in the estimation of coupling constants between the protons *a* and *b* (closest to tellurium), and between the protons of position *a/b* and *c/d* (see Figure 1S). The geminal coupling constants of  $|^2J_{aa'}|=12.3$  Hz (*cis* isomer) and  $|^2J_{aa'}|=12.4$  Hz (*trans* isomer) are rather typical for cycloalkane derivatives. The signal assignment to hydrogens *a* and *a'* is not unambiguous but that does not preclude the assignment of these two multiplets to the pair *a/a'*. This model is consistent with the slight lowfield shift all  $\alpha$ -methylene signals experience compared to the free ligand [1].

It can clearly be seen in Figure 1S(a) that immediately after the dissolution, *cis*-[PtCl<sub>2</sub>{Te(CH<sub>2</sub>)<sub>6</sub>}<sub>2</sub>] is the major species, but the relative concentration of *trans*-[PtCl<sub>2</sub>{Te(CH<sub>2</sub>)<sub>6</sub>}<sub>2</sub>] rapidly increases as a function of time [Figure 1S(b)].

## 1.2 $^{125}\text{Te}\{^1\text{H}\}$ and $^{195}\text{Pt}\{^1\text{H}\}$ NMR spectra of the reaction mixture of *cis*-[PtCl<sub>2</sub>(NPh)<sub>2</sub>] and Te(CH<sub>2</sub>)<sub>6</sub>

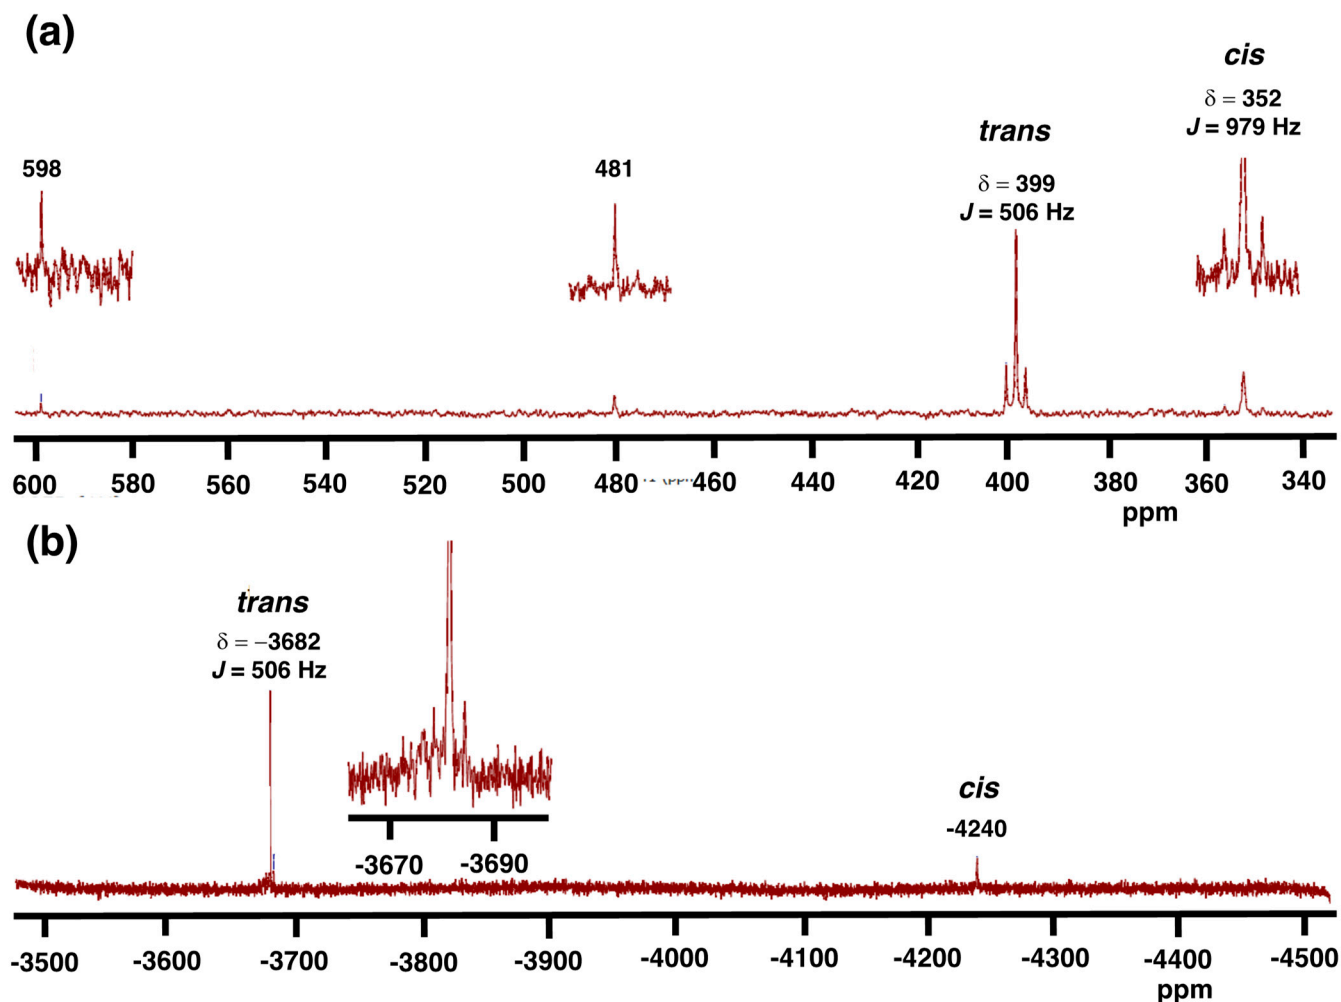

**Figure S3.** (a) The  $^{125}\text{Te}\{^1\text{H}\}$  NMR and (b) the  $^{195}\text{Pt}\{^1\text{H}\}$  NMR spectra from the reaction solution of *cis*-[PtCl<sub>2</sub>(NPh)<sub>2</sub>] and Te(CH<sub>2</sub>)<sub>6</sub>.

## 2. X-ray crystallography

**Table S1.** Crystal data and refinement details for the X-ray structure determinations of *cis*-[PtCl<sub>2</sub>{Te(CH<sub>2</sub>)<sub>6</sub>}<sub>2</sub>] (**1<sub>cis</sub>**), *cis-trans*-[Pt<sub>3</sub>Cl<sub>6</sub>{Te(CH<sub>2</sub>)<sub>6</sub>}<sub>4</sub>] · 1¼CH<sub>2</sub>Cl<sub>2</sub> (**2** · 1¼CH<sub>2</sub>Cl<sub>2</sub>), *cis-trans*-[Pt<sub>4</sub>Cl<sub>8</sub>{Te(CH<sub>2</sub>)<sub>6</sub>}<sub>4</sub>] · 4CDCl<sub>3</sub> (**3** · 4CDCl<sub>3</sub>), and [PtCl<sub>2</sub>{S(O)(CD<sub>3</sub>)<sub>2</sub>}{Te(CH<sub>2</sub>)<sub>6</sub>}] (**4**).

| Compound                                                                  | <b>1<sub>cis</sub></b>                                            | <b>2</b> · 1¼CH <sub>2</sub> Cl <sub>2</sub>                                      | <b>3</b> · 4CDCl <sub>3</sub> <sup>a</sup>                                       | <b>4</b> <sup>a</sup>                                  |
|---------------------------------------------------------------------------|-------------------------------------------------------------------|-----------------------------------------------------------------------------------|----------------------------------------------------------------------------------|--------------------------------------------------------|
| formula                                                                   | C <sub>12</sub> H <sub>24</sub> Cl <sub>2</sub> PtTe <sub>2</sub> | C <sub>25.5</sub> H <sub>51</sub> Cl <sub>9</sub> Pt <sub>3</sub> Te <sub>4</sub> | C <sub>28</sub> H <sub>52</sub> Cl <sub>20</sub> Pt <sub>4</sub> Te <sub>4</sub> | C <sub>8</sub> H <sub>18</sub> Cl <sub>2</sub> OPtS Te |
| fw (g·mol <sup>-1</sup> )                                                 | 689.50                                                            | 1772.38                                                                           | 2388.45                                                                          | 555.87                                                 |
| T/°C                                                                      | -140(2)                                                           | -140(2)                                                                           | -140(2)                                                                          | -140(2)                                                |
| crystal system                                                            | orthorhombic                                                      | triclinic                                                                         | monoclinic                                                                       | monoclinic                                             |
| space group                                                               | <i>Pbca</i>                                                       | <i>Pī</i>                                                                         | <i>C2/c</i>                                                                      | <i>P2<sub>1</sub>/c</i>                                |
| <i>a</i> /Å                                                               | 12.4443(3)                                                        | 12.5826(4)                                                                        | 12.7358(3)                                                                       | 9.9274(2)                                              |
| <i>b</i> /Å                                                               | 12.8290(3)                                                        | 12.6959(4)                                                                        | 18.6821(5)                                                                       | 16.3202(4)                                             |
| <i>c</i> /Å                                                               | 21.2611(4)                                                        | 26.7884(8)                                                                        | 24.5098(6)                                                                       | 9.0309(2)                                              |
| <i>α</i> /°                                                               | 90                                                                | 93.341(1)                                                                         | 90                                                                               | 90                                                     |
| <i>β</i> /°                                                               | 90                                                                | 98.757(1)                                                                         | 97.857(1)                                                                        | 108.8660(10)                                           |
| <i>γ</i> /°                                                               | 90                                                                | 90.571(1)                                                                         | 90                                                                               | 90                                                     |
| <i>V</i> /Å <sup>3</sup>                                                  | 3394.29(13)                                                       | 4221.5(2)                                                                         | 5776.9(3)                                                                        | 1384.56(5)                                             |
| <i>Z</i>                                                                  | 8                                                                 | 4                                                                                 | 4                                                                                | 4                                                      |
| <i>ρ</i> (g·cm <sup>-3</sup> )                                            | 2.699                                                             | 2.789                                                                             | 2.746                                                                            | 2.667                                                  |
| <i>μ</i> (cm <sup>-1</sup> )                                              | 119.33                                                            | 132.15                                                                            | 125.85                                                                           | 127.07                                                 |
| measured data                                                             | 19066                                                             | 35285                                                                             | 32246                                                                            | 15959                                                  |
| data with <i>I</i> > 2σ( <i>I</i> )                                       | 3337                                                              | 14448                                                                             | 6312                                                                             | 3092                                                   |
| unique data ( <i>R</i> <sub>int</sub> )                                   | 3887/0.0784                                                       | 18271/0.0417                                                                      | 6614/0.0381                                                                      | 3167/0.0263                                            |
| <i>wR</i> <sub>2</sub> (all data, on <i>F</i> <sup>2</sup> ) <sup>b</sup> | 0.0825                                                            | 0.2461                                                                            | 0.0939                                                                           | 0.0339                                                 |
| <i>R</i> <sub>1</sub> ( <i>I</i> > 2σ( <i>I</i> )) <sup>b</sup>           | 0.0433                                                            | 0.0787                                                                            | 0.0411                                                                           | 0.0150                                                 |
| <i>S</i> <sup>c</sup>                                                     | 1.093                                                             | 1.067                                                                             | 1.114                                                                            | 1.119                                                  |
| Res. Dens./e·Å <sup>-3</sup>                                              | 1.993/-1.591                                                      | 6.215/-1.735                                                                      | 5.661/-2.911                                                                     | 0.612/-0.903                                           |
| absorpt method                                                            | multi-scan                                                        | multi-scan                                                                        | multi-scan                                                                       | multi-scan                                             |
| absorpt corr <i>T</i> <sub>min</sub> / <sub>max</sub>                     | 0.3791/0.7456                                                     | 0.2703/0.7456                                                                     | 0.4244/0.7456                                                                    | 0.5337/0.7456                                          |
| CCDC No.                                                                  | 2298160                                                           | 2298161                                                                           | 2298162                                                                          | 2301073                                                |

<sup>a</sup> D atoms have been designated as H. <sup>b</sup> Definition of the *R* indices:  $R_1 = (\sum ||F_o| - |F_c||) / \sum |F_o|$ ;  $wR_2 = \{\sum [w(F_o^2 - F_c^2)^2] / \sum [w(F_o^2)^2]\}^{1/2}$  with  $w^{-1} = 2(F_o^2) + (aP)^2 + bP$ ;  $P = [2F_c^2 + \text{Max}(F_o^2)]/3$ ; <sup>c</sup>  $S = \{\sum [w(F_o^2 - F_c^2)^2] / (N_o - p..)\}^{1/2}$ .

**Table S2.** Selected bond lengths (Å) and angles (°) in *cis-trans*-[Pt<sub>3</sub>Cl<sub>6</sub>{Te(CH<sub>2</sub>)<sub>6</sub>}<sub>4</sub>] · 1¼CH<sub>2</sub>Cl<sub>2</sub> (**2** · 1¼CH<sub>2</sub>Cl<sub>2</sub>), and *cis-trans*-[Pt<sub>4</sub>Cl<sub>8</sub>{Te(CH<sub>2</sub>)<sub>6</sub>}<sub>4</sub>] · 4CDCl<sub>3</sub> (**3** · 4CDCl<sub>3</sub>).

| 2 · 1¼CH <sub>2</sub> Cl <sub>2</sub> |                |                |                |                |                | 3 · 4CDCl <sub>3</sub> |           |             |           |
|---------------------------------------|----------------|----------------|----------------|----------------|----------------|------------------------|-----------|-------------|-----------|
| A <sup>a</sup>                        |                |                | B <sup>a</sup> |                |                |                        |           |             |           |
|                                       | A <sup>a</sup> | B <sup>a</sup> |                | A <sup>a</sup> | B <sup>a</sup> |                        |           |             |           |
| Pt1-Te1                               | 2.5178(15)     | 2.5140(15)     | Te1-Pt1-Te4    | 92.26(5)       | 92.13(5)       | Pt1-Te1                | 2.5045(7) | Te1-Pt1-Te2 | 94.86(2)  |
| Pt1-Te4                               | 2.5170(16)     | 2.5219(16)     | Te1-Pt1-Cl1    | 178.57(13)     | 178.57(14)     | Pt1-Te2                | 2.5226(6) | Te1-Pt1-Cl1 | 88.16(6)  |
| Pt2-Te1                               | 2.5774(15)     | 2.5768(17)     | Te1-Pt1-Cl2    | 88.88(13)      | 88.249(2)      | Pt2-Te1                | 2.5577(6) | Te1-Pt1-Cl2 | 175.20(7) |
| Pt2-Te2                               | 2.5560(15)     | 2.568(2)       | Te4-Pt1-Cl1    | 89.16(14)      | 89.35(14)      | Pt2-Te2                | 2.5546(6) | Te2-Pt1-Cl1 | 173.72(7) |
| Pt3-Te3                               | 2.5608(17)     | 2.5626(15)     | Te4-Pt1-Cl2    | 177.75(14)     | 178.45(15)     | Pt1-Cl1                | 2.321(2)  | Te2-Pt1-Cl2 | 87.06(7)  |
| Pt3-Te4                               | 2.5640(15)     | 2.5635(14)     | Cl1-Pt1-Cl2    | 88.88(14)      | 88.28(15)      | Pt1-Cl2                | 2.309(3)  | Cl1-Pt1-Cl2 | 90.35(9)  |
| Pt1-Cl1                               | 2.331(5)       | 2.330(5)       | Te1-Pt2-Te2    | 176.56(5)      | 173.87(6)      | Pt2-Cl3                | 2.305(2)  | Te1-Pt2-Te2 | 178.92(2) |
| Pt1-Cl2                               | 2.311(6)       | 2.328(6)       | Te1-Pt2-Cl3    | 84.33(13)      | 83.57(13)      | Pt2-Cl4                | 2.302(2)  | Te1-Pt2-Cl3 | 93.43(6)  |
| Pt2-Cl3                               | 2.307(5)       | 2.313(5)       | Te1-Pt2-Cl4    | 95.79(14)      | 94.97(13)      | Pt2···Pt2              | 3.0765(6) | Te1-Pt2-Cl4 | 86.29(6)  |
| Pt2-Cl4                               | 2.305(6)       | 2.316(5)       | Te2-Pt2-Cl3    | 94.74(13)      | 94.32(13)      | Te1···Cl3              | 3.527(2)  | Te2-Pt2-Cl3 | 85.52(6)  |
| Pt3-Cl5                               | 2.309(5)       | 2.325(6)       | Te2-Pt2-Cl4    | 85.16(13)      | 87.29(13)      | Te2···Cl4              | 3.556(2)  | Te2-Pt2-Cl4 | 94.77(6)  |
| Pt3-Cl6                               | 2.313(6)       | 2.320(6)       | Cl3-Pt2-Cl4    | 179.8(2)       | 178.3(2)       |                        |           | Cl3-Pt2-Cl4 | 175.77(7) |
| Pt2···Pt3                             | 3.1499(13)     | 3.1170(11)     | Te3-Pt3-Te4    | 178.14(6)      | 179.28(5)      |                        |           |             |           |
| Te1···Cl6                             | 3.481(7)       | 3.512(5)       | Te3-Pt3-Cl5    | 85.47(14)      | 86.53(15)      |                        |           |             |           |
| Te2···Cl5                             | 3.922(6)       | 3.964(6)       | Te3-Pt3-Cl6    | 95.62(16)      | 95.26(13)      |                        |           |             |           |
| Te3···Cl4                             | 3.594(6)       | 3.435(6)       | Te4-Pt3-Cl5    | 92.72(14)      | 92.78(15)      |                        |           |             |           |
| Te4···Cl3                             | 3.590(5)       | 3.590(5)       | Te4-Pt3-Cl6    | 86.16(16)      | 85.44(13)      |                        |           |             |           |
|                                       |                |                | Cl5-Pt3-Cl6    | 174.70(14)     | 175.3(2)       |                        |           |             |           |

<sup>a</sup> The asymmetric unit contains two independent molecules that have been denoted by A and B.

### 3. DFT Computations<sup>1</sup>

#### 3.1 Optimum geometries

**Table S3.** Atomic coordinates (Å) of the PBE0-D3/def2-TZVP optimized species discussed in this contribution.

***PhCN C<sub>2v</sub> E=-324.228470092 a.u.***

|   |             |              |              |   |             |              |              |
|---|-------------|--------------|--------------|---|-------------|--------------|--------------|
| C | 0.000000000 | 0.000000000  | 0.604835000  | H | 0.000000000 | 2.141688000  | -2.014339000 |
| C | 0.000000000 | 1.209525000  | -0.089890000 | H | 0.000000000 | 0.000000000  | -3.248749000 |
| C | 0.000000000 | 1.203159000  | -1.473355000 | H | 0.000000000 | -2.141688000 | -2.014339000 |
| C | 0.000000000 | 0.000000000  | -2.165113000 | H | 0.000000000 | -2.141617000 | 0.461061000  |
| C | 0.000000000 | -1.203159000 | -1.473355000 | C | 0.000000000 | 0.000000000  | 2.031910000  |
| C | 0.000000000 | -1.209525000 | -0.089890000 | N | 0.000000000 | 0.000000000  | 3.183492000  |
| H | 0.000000000 | 2.141617000  | 0.461061000  |   |             |              |              |

***Te(CH<sub>2</sub>)<sub>6</sub> C<sub>1</sub> E=-503.704254999 a.u.***

|    |              |              |              |   |              |              |              |
|----|--------------|--------------|--------------|---|--------------|--------------|--------------|
| Te | -1.210147000 | -0.092563000 | -0.101255000 | C | 2.574441000  | -0.570581000 | -0.086381000 |
| C  | -0.142466000 | 1.767622000  | 0.146456000  | H | 3.411818000  | -0.895108000 | -0.712723000 |
| H  | -0.249894000 | 2.288014000  | -0.807522000 | H | 2.966064000  | -0.528994000 | 0.937879000  |
| H  | -0.672345000 | 2.335706000  | 0.910062000  | C | 1.501412000  | -1.646643000 | -0.166658000 |
| C  | 1.320721000  | 1.610532000  | 0.506850000  | H | 1.189195000  | -1.776675000 | -1.207944000 |
| H  | 1.411655000  | 1.145454000  | 1.493685000  | H | 1.962004000  | -2.595596000 | 0.137101000  |
| H  | 1.726403000  | 2.622252000  | 0.625499000  | C | 0.273519000  | -1.425347000 | 0.698719000  |
| C  | 2.172907000  | 0.840225000  | -0.509266000 | H | 0.529626000  | -1.090026000 | 1.704770000  |
| H  | 1.652078000  | 0.801754000  | -1.472985000 | H | -0.295924000 | -2.351006000 | 0.806406000  |
| H  | 3.093740000  | 1.402635000  | -0.687287000 |   |              |              |              |

***cis-[PtCl<sub>2</sub>(NCPH)<sub>2</sub>] C<sub>s</sub> E=-1688.06794514 a.u.***

|    |              |              |             |    |              |             |             |
|----|--------------|--------------|-------------|----|--------------|-------------|-------------|
| C  | -1.448801000 | -3.655410000 | 0.000000000 | Cl | 2.748639000  | 1.625916000 | 0.000000000 |
| C  | -2.843133000 | -3.708134000 | 0.000000000 | N  | -0.148166000 | 1.446649000 | 0.000000000 |
| C  | -3.472666000 | -4.938992000 | 0.000000000 | C  | -0.765694000 | 2.413804000 | 0.000000000 |
| C  | -2.721177000 | -6.106566000 | 0.000000000 | C  | -1.448598000 | 3.655540000 | 0.000000000 |
| C  | -1.333906000 | -6.049577000 | 0.000000000 | C  | -2.842946000 | 3.708161000 | 0.000000000 |
| C  | -0.687992000 | -4.827309000 | 0.000000000 | C  | -0.687892000 | 4.827497000 | 0.000000000 |
| H  | -3.417083000 | -2.790020000 | 0.000000000 | C  | -3.472576000 | 4.938963000 | 0.000000000 |
| H  | -4.554686000 | -4.988661000 | 0.000000000 | H  | -3.416816000 | 2.789996000 | 0.000000000 |
| H  | -3.220818000 | -7.068098000 | 0.000000000 | C  | -1.333906000 | 6.049717000 | 0.000000000 |
| H  | -0.751248000 | -6.962619000 | 0.000000000 | H  | 0.393210000  | 4.759767000 | 0.000000000 |
| H  | 0.393104000  | -4.759480000 | 0.000000000 | C  | -2.721176000 | 6.106599000 | 0.000000000 |
| C  | -0.765938000 | -2.413644000 | 0.000000000 | H  | -4.554600000 | 4.988549000 | 0.000000000 |
| N  | -0.148356000 | -1.446524000 | 0.000000000 | H  | -0.751316000 | 6.962802000 | 0.000000000 |
| Pt | 1.166735000  | -0.000007000 | 0.000000000 | H  | -3.220893000 | 7.068092000 | 0.000000000 |
| Cl | 2.748412000  | -1.626185000 | 0.000000000 |    |              |             |             |

***trans-[PtCl<sub>2</sub>(NCPH)<sub>2</sub>] D<sub>2h</sub> E=-1688.07709399 a.u.***

|   |             |              |             |    |             |              |              |
|---|-------------|--------------|-------------|----|-------------|--------------|--------------|
| C | 0.000000000 | 0.000000000  | 4.484879000 | C  | 0.000000000 | 0.000000000  | 3.068206000  |
| C | 0.000000000 | 1.214614000  | 5.173137000 | N  | 0.000000000 | 0.000000000  | 1.922951000  |
| C | 0.000000000 | 1.205326000  | 6.555534000 | Pt | 0.000000000 | 0.000000000  | 0.000000000  |
| C | 0.000000000 | 0.000000000  | 7.244835000 | Cl | 0.000000000 | -2.307595000 | 0.000000000  |
| C | 0.000000000 | -1.205326000 | 6.555534000 | Cl | 0.000000000 | 2.307595000  | 0.000000000  |
| C | 0.000000000 | -1.214614000 | 5.173137000 | N  | 0.000000000 | 0.000000000  | -1.922951000 |
| H | 0.000000000 | 2.144470000  | 4.618226000 | C  | 0.000000000 | 0.000000000  | -3.068206000 |
| H | 0.000000000 | 2.142823000  | 7.097943000 | C  | 0.000000000 | 0.000000000  | -4.484879000 |
| H | 0.000000000 | 0.000000000  | 8.328483000 | C  | 0.000000000 | -1.214614000 | -5.173137000 |
| H | 0.000000000 | -2.142823000 | 7.097943000 | C  | 0.000000000 | 1.214614000  | -5.173137000 |
| H | 0.000000000 | -2.144470000 | 4.618226000 | C  | 0.000000000 | -1.205326000 | -6.555534000 |

|   |             |              |              |
|---|-------------|--------------|--------------|
| H | 0.000000000 | -2.144470000 | -4.618226000 |
| C | 0.000000000 | 1.205326000  | -6.55534000  |
| H | 0.000000000 | 2.144470000  | -4.618226000 |
| C | 0.000000000 | 0.000000000  | -7.244835000 |

|   |             |              |              |
|---|-------------|--------------|--------------|
| H | 0.000000000 | -2.142823000 | -7.097943000 |
| H | 0.000000000 | 2.142823000  | -7.097943000 |
| H | 0.000000000 | 0.000000000  | -8.328483000 |

***cis-[PtCl<sub>2</sub>{Te(CH<sub>2</sub>)<sub>6</sub>}<sub>2</sub>] C<sub>1</sub> E=-2047.06703240 a.u.***

|    |              |              |              |
|----|--------------|--------------|--------------|
| Pt | -0.146560000 | -1.095428000 | 0.099196000  |
| Te | 1.532599000  | 0.680053000  | -0.550223000 |
| Te | -2.219050000 | -0.074417000 | -0.933730000 |
| Cl | -1.724300000 | -2.744233000 | 0.613361000  |
| Cl | 1.557618000  | -2.281023000 | 1.147292000  |
| C  | 2.318033000  | 1.174401000  | 1.378314000  |
| H  | 1.462031000  | 1.550590000  | 1.939703000  |
| H  | 2.576882000  | 0.203201000  | 1.797820000  |
| C  | 3.464858000  | 2.172227000  | 1.332542000  |
| H  | 4.025965000  | 2.079756000  | 2.270148000  |
| H  | 3.054136000  | 3.186251000  | 1.322355000  |
| C  | 4.421598000  | 2.047322000  | 0.153133000  |
| H  | 3.863665000  | 2.241474000  | -0.772732000 |
| H  | 5.148153000  | 2.862974000  | 0.219700000  |
| C  | 5.192048000  | 0.740076000  | 0.012122000  |
| H  | 5.845451000  | 0.609768000  | 0.881429000  |
| H  | 5.859166000  | 0.849909000  | -0.850067000 |
| C  | 4.372891000  | -0.536219000 | -0.164548000 |
| H  | 5.052469000  | -1.331090000 | -0.493132000 |
| H  | 3.967926000  | -0.891236000 | 0.783303000  |
| C  | 3.252532000  | -0.469616000 | -1.182676000 |

|   |              |              |              |
|---|--------------|--------------|--------------|
| H | 2.839265000  | -1.458772000 | -1.370607000 |
| H | 3.569919000  | -0.015892000 | -2.124201000 |
| C | -1.805695000 | 2.019445000  | -1.171011000 |
| H | -1.004865000 | 2.017458000  | -1.914054000 |
| H | -2.684170000 | 2.458469000  | -1.648274000 |
| C | -1.401339000 | 2.790625000  | 0.074782000  |
| H | -0.815591000 | 2.151988000  | 0.746843000  |
| H | -0.729820000 | 3.597640000  | -0.239314000 |
| C | -2.557514000 | 3.414072000  | 0.845472000  |
| H | -3.207767000 | 3.942179000  | 0.136931000  |
| H | -2.144831000 | 4.186098000  | 1.502725000  |
| C | -3.402168000 | 2.486623000  | 1.707071000  |
| H | -2.764176000 | 2.008478000  | 2.459752000  |
| H | -4.099736000 | 3.117589000  | 2.266281000  |
| C | -4.212003000 | 1.404125000  | 0.995034000  |
| H | -4.620035000 | 1.788384000  | 0.052997000  |
| H | -5.086396000 | 1.177388000  | 1.615270000  |
| C | -3.492531000 | 0.084668000  | 0.792957000  |
| H | -4.188977000 | -0.738043000 | 0.635485000  |
| H | -2.862215000 | -0.181446000 | 1.639656000  |

***trans-[PtCl<sub>2</sub>{Te(CH<sub>2</sub>)<sub>6</sub>}<sub>2</sub>] C<sub>1</sub> E=-2047.08131913 a.u.***

|    |              |              |              |
|----|--------------|--------------|--------------|
| Pt | -0.000041000 | -0.741429000 | 0.000040000  |
| Te | 2.532226000  | -0.744071000 | 0.507497000  |
| Te | -2.532314000 | -0.744031000 | -0.507416000 |
| Cl | -0.231568000 | -0.765587000 | 2.303753000  |
| Cl | 0.231469000  | -0.765956000 | -2.303673000 |
| C  | 2.657679000  | 1.086279000  | 1.621284000  |
| H  | 2.349058000  | 0.748860000  | 2.611282000  |
| H  | 3.716294000  | 1.352034000  | 1.662675000  |
| C  | 1.774308000  | 2.223153000  | 1.144918000  |
| H  | 1.651074000  | 2.909937000  | 1.991249000  |
| H  | 0.778943000  | 1.822027000  | 0.933380000  |
| C  | 2.275387000  | 3.029405000  | -0.042640000 |
| H  | 1.553719000  | 3.835630000  | -0.211601000 |
| H  | 3.217208000  | 3.524702000  | 0.226473000  |
| C  | 2.474635000  | 2.281258000  | -1.356944000 |
| H  | 2.543436000  | 3.029510000  | -2.151192000 |
| H  | 1.590285000  | 1.679013000  | -1.590091000 |
| C  | 3.725693000  | 1.397534000  | -1.417757000 |
| H  | 4.228643000  | 1.550030000  | -2.379606000 |
| H  | 4.447951000  | 1.719635000  | -0.660058000 |
| C  | 3.476059000  | -0.092378000 | -1.307263000 |

|   |              |              |              |
|---|--------------|--------------|--------------|
| H | 4.405765000  | -0.660004000 | -1.364909000 |
| H | 2.796224000  | -0.441359000 | -2.086707000 |
| C | -3.476057000 | -0.092042000 | 1.307286000  |
| H | -4.405786000 | -0.659616000 | 1.365060000  |
| H | -2.796200000 | -0.440928000 | 2.086753000  |
| C | -3.725578000 | 1.397903000  | 1.417533000  |
| H | -4.447712000 | 1.719968000  | 0.659700000  |
| H | -4.228623000 | 1.550603000  | 2.379299000  |
| C | -2.474393000 | 2.281446000  | 1.356699000  |
| H | -1.590143000 | 1.679076000  | 1.589905000  |
| H | -2.543101000 | 3.029761000  | 2.150895000  |
| C | -2.274995000 | 3.029457000  | 0.042342000  |
| H | -3.216730000 | 3.524885000  | -0.226831000 |
| H | -1.553196000 | 3.835576000  | 0.211247000  |
| C | -1.774030000 | 2.223015000  | -1.145136000 |
| H | -0.778723000 | 1.821770000  | -0.933544000 |
| H | -1.650693000 | 2.909690000  | -1.991539000 |
| C | -2.657556000 | 1.086211000  | -1.621384000 |
| H | -2.348972000 | 0.748639000  | -2.611343000 |
| H | -3.716136000 | 1.352095000  | -1.662807000 |

***[Pt<sub>2</sub>Cl<sub>4</sub>{Te(CH<sub>2</sub>)<sub>6</sub>}<sub>3</sub>] C<sub>1</sub> E=-3590.43986476 a.u.***

|    |              |              |              |
|----|--------------|--------------|--------------|
| Pt | 2.623285000  | 1.047304000  | 0.075026000  |
| Pt | -1.599956000 | -0.241632000 | -0.400069000 |
| Te | 2.249045000  | -1.444715000 | -0.326524000 |
| Te | -3.473540000 | -2.000594000 | -0.639439000 |
| Te | 0.188951000  | 1.573352000  | -0.140589000 |

|    |              |              |              |
|----|--------------|--------------|--------------|
| Cl | 2.845130000  | 3.353633000  | 0.420918000  |
| Cl | 4.871370000  | 0.717947000  | 0.462798000  |
| Cl | -2.410751000 | 0.616068000  | -2.383382000 |
| Cl | -0.727353000 | -1.107002000 | 1.567083000  |
| C  | 4.055866000  | -2.014874000 | -1.322886000 |



|   |              |              |              |   |              |              |              |
|---|--------------|--------------|--------------|---|--------------|--------------|--------------|
| H | 4.024304000  | -1.483250000 | -2.275060000 | H | -4.682453000 | -0.380681000 | 3.493586000  |
| H | 4.853595000  | -1.567493000 | -0.734271000 | H | -3.470772000 | -0.356918000 | 2.238167000  |
| C | 4.182958000  | -3.518191000 | -1.506898000 | C | -4.779341000 | -2.078819000 | 2.187258000  |
| H | 5.231884000  | -3.736226000 | -1.741291000 | H | -4.795021000 | -2.606133000 | 3.147811000  |
| H | 3.604955000  | -3.826567000 | -2.383324000 | H | -5.778977000 | -2.221256000 | 1.763660000  |
| C | 3.739180000  | -4.376090000 | -0.328619000 | C | -3.745224000 | -2.788661000 | 1.338471000  |
| H | 2.654025000  | -4.266941000 | -0.200376000 | H | -3.996630000 | -3.840211000 | 1.193942000  |
| H | 3.885269000  | -5.425825000 | -0.601331000 | H | -2.749400000 | -2.718446000 | 1.779210000  |
| C | 4.428225000  | -4.135458000 | 1.009867000  | C | -0.078362000 | 3.171994000  | -1.523538000 |
| H | 5.503976000  | -4.311034000 | 0.903126000  | H | 0.939572000  | 3.422008000  | -1.820214000 |
| H | 4.065478000  | -4.905553000 | 1.699403000  | H | -0.623595000 | 2.712868000  | -2.349636000 |
| C | 4.220288000  | -2.768649000 | 1.665093000  | C | -0.813571000 | 4.354949000  | -0.932956000 |
| H | 4.490819000  | -2.856728000 | 2.723526000  | H | -0.193537000 | 4.820693000  | -0.161824000 |
| H | 4.902419000  | -2.017500000 | 1.263098000  | H | -0.883907000 | 5.093571000  | -1.738910000 |
| C | 2.804186000  | -2.236366000 | 1.606210000  | C | -2.219027000 | 4.060494000  | -0.390459000 |
| H | 2.663173000  | -1.387634000 | 2.272366000  | H | -2.594927000 | 3.123719000  | -0.818727000 |
| H | 2.049551000  | -2.991355000 | 1.833644000  | H | -2.895947000 | 4.838519000  | -0.752326000 |
| C | -5.171637000 | -0.689656000 | -0.711354000 | C | -2.337022000 | 4.030385000  | 1.131886000  |
| H | -5.177585000 | -0.411215000 | -1.765567000 | H | -1.832752000 | 4.913643000  | 1.541770000  |
| H | -6.045506000 | -1.315146000 | -0.515905000 | H | -3.393863000 | 4.138803000  | 1.396197000  |
| C | -5.110505000 | 0.544654000  | 0.167806000  | C | -1.822320000 | 2.787232000  | 1.842064000  |
| H | -5.831592000 | 1.261782000  | -0.242771000 | H | -2.393521000 | 1.908877000  | 1.520923000  |
| H | -4.126552000 | 1.007074000  | 0.049021000  | H | -2.024014000 | 2.898232000  | 2.913681000  |
| C | -5.426328000 | 0.356271000  | 1.642999000  | C | -0.342535000 | 2.495255000  | 1.702261000  |
| H | -5.383122000 | 1.346004000  | 2.109161000  | H | -0.010816000 | 1.739332000  | 2.415100000  |
| H | -6.465566000 | 0.021355000  | 1.752467000  | H | 0.311396000  | 3.364206000  | 1.784592000  |
| C | -4.523906000 | -0.587177000 | 2.431969000  |   |              |              |              |

**[Pt<sub>3</sub>Cl<sub>6</sub>{Te(CH<sub>2</sub>)<sub>6</sub>}<sub>4</sub>] C<sub>1</sub> E=-5133.82851344 a.u.**

|    |              |              |              |   |              |              |              |
|----|--------------|--------------|--------------|---|--------------|--------------|--------------|
| Pt | 3.320924000  | -0.226714000 | 0.008568000  | C | 1.569889000  | -1.709282000 | 3.111812000  |
| Pt | -0.869579000 | -1.519234000 | -0.060186000 | H | 2.158306000  | -0.826126000 | 3.355465000  |
| Pt | -0.643947000 | 1.638979000  | 0.021760000  | H | 0.538816000  | -1.558335000 | 3.436483000  |
| Te | 1.482135000  | -1.648664000 | 0.975738000  | C | -2.907273000 | -1.879476000 | -3.225953000 |
| Te | -3.203688000 | -1.426418000 | -1.152774000 | H | -3.594027000 | -1.211088000 | -3.746995000 |
| Te | -2.993066000 | 1.833247000  | 1.072322000  | H | -1.885507000 | -1.550825000 | -3.418564000 |
| Te | 1.715626000  | 1.436328000  | -0.981840000 | C | -3.119186000 | -3.325585000 | -3.623769000 |
| Cl | 5.001649000  | 0.966308000  | -1.047450000 | H | -4.159014000 | -3.621609000 | -3.447720000 |
| Cl | 4.838720000  | -1.632045000 | 1.049603000  | H | -2.990674000 | -3.358186000 | -4.711829000 |
| Cl | 0.309214000  | -1.633752000 | -2.049264000 | C | -2.168350000 | -4.338940000 | -2.976814000 |
| Cl | -2.025225000 | -1.450154000 | 1.953295000  | H | -1.835774000 | -5.035661000 | -3.750997000 |
| Cl | -1.753484000 | 1.786782000  | -2.009437000 | H | -1.266148000 | -3.825366000 | -2.629410000 |
| Cl | 0.498442000  | 1.547345000  | 2.035481000  | C | -2.765533000 | -5.170959000 | -1.846638000 |
| C  | 2.099841000  | -3.643601000 | 0.579349000  | H | -2.112554000 | -6.033062000 | -1.676234000 |
| H  | 2.242952000  | -3.648475000 | -0.501642000 | H | -3.725549000 | -5.585908000 | -2.179973000 |
| H  | 3.081257000  | -3.710661000 | 1.045638000  | C | -2.958611000 | -4.481135000 | -0.505741000 |
| C  | 1.101583000  | -4.687963000 | 1.044216000  | H | -3.320189000 | -5.229008000 | 0.210314000  |
| H  | 1.628435000  | -5.648845000 | 1.083546000  | H | -1.994931000 | -4.130833000 | -0.120534000 |
| H  | 0.324763000  | -4.792258000 | 0.281232000  | C | -3.940258000 | -3.325603000 | -0.478946000 |
| C  | 0.413158000  | -4.421381000 | 2.376660000  | H | -4.222405000 | -3.081463000 | 0.546679000  |
| H  | -0.257105000 | -3.560233000 | 2.265762000  | H | -4.852913000 | -3.527993000 | -1.044275000 |
| H  | -0.255310000 | -5.263797000 | 2.579692000  | C | -3.415723000 | 3.868644000  | 0.545255000  |
| C  | 1.295604000  | -4.220560000 | 3.603814000  | H | -3.658094000 | 3.755369000  | -0.513219000 |
| H  | 1.915973000  | -5.108829000 | 3.764168000  | H | -4.329632000 | 4.148737000  | 1.074270000  |
| H  | 0.624960000  | -4.161741000 | 4.467395000  | C | -2.293717000 | 4.870448000  | 0.737301000  |
| C  | 2.202929000  | -2.988022000 | 3.624024000  | H | -2.497830000 | 5.716487000  | 0.070000000  |
| H  | 2.501171000  | -2.803085000 | 4.662019000  | H | -1.357583000 | 4.423314000  | 0.386879000  |
| H  | 3.139199000  | -3.166671000 | 3.090944000  | C | -2.111908000 | 5.416797000  | 2.144188000  |

|   |              |             |              |
|---|--------------|-------------|--------------|
| H | -1.356214000 | 6.206940000 | 2.089461000  |
| H | -3.039000000 | 5.911959000 | 2.461006000  |
| C | -1.684689000 | 4.427745000 | 3.223297000  |
| H | -1.332447000 | 5.013100000 | 4.077039000  |
| H | -0.821039000 | 3.849050000 | 2.879604000  |
| C | -2.776717000 | 3.473386000 | 3.718326000  |
| H | -2.704172000 | 3.383582000 | 4.808392000  |
| H | -3.766255000 | 3.904236000 | 3.530261000  |
| C | -2.702045000 | 2.058894000 | 3.182715000  |
| H | -3.467553000 | 1.417685000 | 3.621662000  |
| H | -1.725921000 | 1.607031000 | 3.360685000  |
| C | 1.806736000  | 1.393621000 | -3.109744000 |
| H | 2.504913000  | 0.582044000 | -3.312535000 |
| H | 0.799368000  | 1.093232000 | -3.400628000 |
| C | 2.232162000  | 2.704603000 | -3.731434000 |

|   |             |             |              |
|---|-------------|-------------|--------------|
| H | 3.256471000 | 2.943354000 | -3.430613000 |
| H | 2.279638000 | 2.518178000 | -4.810177000 |
| C | 1.298821000 | 3.892879000 | -3.465923000 |
| H | 0.305622000 | 3.527798000 | -3.178051000 |
| H | 1.154273000 | 4.430257000 | -4.406771000 |
| C | 1.797781000 | 4.906316000 | -2.439177000 |
| H | 2.838205000 | 5.164686000 | -2.670785000 |
| H | 1.223109000 | 5.829230000 | -2.565508000 |
| C | 1.696419000 | 4.509632000 | -0.974147000 |
| H | 0.650005000 | 4.311575000 | -0.715254000 |
| H | 1.998502000 | 5.369894000 | -0.365951000 |
| C | 2.555384000 | 3.340041000 | -0.539043000 |
| H | 2.635036000 | 3.274727000 | 0.547588000  |
| H | 3.561347000 | 3.328251000 | -0.958496000 |

**[Pt<sub>4</sub>Cl<sub>8</sub>{Te(CH<sub>2</sub>)<sub>6</sub>]<sub>4</sub> D<sub>2</sub> E=-6173.45185839 a.u.**

|    |              |              |              |
|----|--------------|--------------|--------------|
| Pt | -4.082078000 | 0.000000000  | 0.000000000  |
| Pt | 0.000000000  | 1.537514000  | 0.000000000  |
| Te | -2.376037000 | -1.574905000 | 0.953694000  |
| Te | -2.376037000 | 1.574905000  | -0.953694000 |
| Cl | -5.673083000 | -1.342847000 | 1.007258000  |
| Cl | -5.673083000 | 1.342847000  | -1.007258000 |
| Cl | -1.044504000 | 1.595352000  | 2.063720000  |
| Cl | 1.044504000  | 1.595352000  | -2.063720000 |
| C  | -2.470431000 | -1.573703000 | 3.081067000  |
| H  | -1.490885000 | -1.197948000 | 3.378847000  |
| H  | -3.233489000 | -0.824932000 | 3.291917000  |
| C  | -2.792164000 | -2.925414000 | 3.677689000  |
| H  | -3.793588000 | -3.239632000 | 3.369283000  |
| H  | -2.857911000 | -2.758402000 | 4.758545000  |
| C  | -1.766944000 | -4.032153000 | 3.400610000  |
| H  | -0.800364000 | -3.585871000 | 3.138732000  |
| H  | -1.596200000 | -4.577805000 | 4.331988000  |
| C  | -2.170020000 | -5.059142000 | 2.345457000  |
| H  | -1.525597000 | -5.935697000 | 2.463068000  |
| H  | -3.189339000 | -5.404725000 | 2.555607000  |
| C  | -2.080245000 | -4.628476000 | 0.889135000  |
| H  | -2.296454000 | -5.500281000 | 0.261410000  |
| H  | -1.051492000 | -4.334381000 | 0.649695000  |
| C  | -3.034708000 | -3.534092000 | 0.456990000  |
| H  | -4.043896000 | -3.618958000 | 0.860323000  |
| H  | -3.101099000 | -3.454079000 | -0.629550000 |
| C  | -2.470431000 | 1.573703000  | -3.081067000 |
| H  | -1.490885000 | 1.197948000  | -3.378847000 |
| H  | -3.233489000 | 0.824932000  | -3.291917000 |
| C  | -2.792164000 | 2.925414000  | -3.677689000 |
| H  | -3.793588000 | 3.239632000  | -3.369283000 |
| H  | -2.857911000 | 2.758402000  | -4.758545000 |
| C  | -1.766944000 | 4.032153000  | -3.400610000 |
| H  | -1.596200000 | 4.577805000  | -4.331988000 |
| H  | -0.800364000 | 3.585871000  | -3.138732000 |
| C  | -2.170020000 | 5.059142000  | -2.345457000 |
| H  | -1.525597000 | 5.935697000  | -2.463068000 |
| H  | -3.189339000 | 5.404725000  | -2.555607000 |
| C  | -2.080245000 | 4.628476000  | -0.889135000 |
| H  | -2.296454000 | 5.500281000  | -0.261410000 |

|    |              |              |              |
|----|--------------|--------------|--------------|
| H  | -1.051492000 | 4.334381000  | -0.649695000 |
| C  | -3.034708000 | 3.534092000  | -0.456990000 |
| H  | -4.043896000 | 3.618958000  | -0.860323000 |
| H  | -3.101099000 | 3.454079000  | 0.629550000  |
| Pt | 4.082078000  | 0.000000000  | 0.000000000  |
| Pt | 0.000000000  | -1.537514000 | 0.000000000  |
| Te | 2.376037000  | 1.574905000  | 0.953694000  |
| Te | 2.376037000  | -1.574905000 | -0.953694000 |
| Cl | 5.673083000  | 1.342847000  | 1.007258000  |
| Cl | 5.673083000  | -1.342847000 | -1.007258000 |
| Cl | 1.044504000  | -1.595352000 | 2.063720000  |
| Cl | -1.044504000 | -1.595352000 | -2.063720000 |
| C  | 2.470431000  | 1.573703000  | 3.081067000  |
| H  | 1.490885000  | 1.197948000  | 3.378847000  |
| H  | 3.233489000  | 0.824932000  | 3.291917000  |
| C  | 2.792164000  | 2.925414000  | 3.677689000  |
| H  | 3.793588000  | 3.239632000  | 3.369283000  |
| H  | 2.857911000  | 2.758402000  | 4.758545000  |
| C  | 1.766944000  | 4.032153000  | 3.400610000  |
| H  | 0.800364000  | 3.585871000  | 3.138732000  |
| H  | 1.596200000  | 4.577805000  | 4.331988000  |
| C  | 2.170020000  | 5.059142000  | 2.345457000  |
| H  | 1.525597000  | 5.935697000  | 2.463068000  |
| H  | 3.189339000  | 5.404725000  | 2.555607000  |
| C  | 2.080245000  | 4.628476000  | 0.889135000  |
| H  | 2.296454000  | 5.500281000  | 0.261410000  |
| H  | 1.051492000  | 4.334381000  | 0.649695000  |
| C  | 3.034708000  | 3.534092000  | 0.456990000  |
| H  | 4.043896000  | 3.618958000  | 0.860323000  |
| H  | 3.101099000  | 3.454079000  | -0.629550000 |
| C  | 2.470431000  | -1.573703000 | -3.081067000 |
| H  | 1.490885000  | -1.197948000 | -3.378847000 |
| H  | 3.233489000  | -0.824932000 | -3.291917000 |
| C  | 2.792164000  | -2.925414000 | -3.677689000 |
| H  | 3.793588000  | -3.239632000 | -3.369283000 |
| H  | 2.857911000  | -2.758402000 | -4.758545000 |
| C  | 1.766944000  | -4.032153000 | -3.400610000 |
| H  | 1.596200000  | -4.577805000 | -4.331988000 |
| H  | 0.800364000  | -3.585871000 | -3.138732000 |
| C  | 2.170020000  | -5.059142000 | -2.345457000 |

|   |             |              |              |   |             |              |              |
|---|-------------|--------------|--------------|---|-------------|--------------|--------------|
| H | 1.525597000 | -5.935697000 | -2.463068000 | H | 1.051492000 | -4.334381000 | -0.649695000 |
| H | 3.189339000 | -5.404725000 | -2.555607000 | C | 3.034708000 | -3.534092000 | -0.456990000 |
| C | 2.080245000 | -4.628476000 | -0.889135000 | H | 4.043896000 | -3.618958000 | -0.860323000 |
| H | 2.296454000 | -5.500281000 | -0.261410000 | H | 3.101099000 | -3.454079000 | 0.629550000  |

**[PtCl<sub>2</sub>{Te(CH<sub>2</sub>)<sub>6</sub>}<sub>2</sub>]<sub>2</sub> dimer, cis conformation C; E=-4094.19210670 a.u.**

|    |              |              |              |   |              |              |              |
|----|--------------|--------------|--------------|---|--------------|--------------|--------------|
| Pt | 1.137936000  | -0.240996000 | -1.241450000 | H | 3.583609000  | 4.392421000  | 0.574166000  |
| Te | 2.689410000  | -1.742826000 | 0.089688000  | H | 5.130206000  | 1.843897000  | 0.237009000  |
| Te | 1.758327000  | 1.875665000  | 0.027578000  | H | 5.522670000  | 3.080346000  | -0.925286000 |
| Cl | -0.173537000 | 1.250464000  | -2.517272000 | H | 3.737048000  | 1.536795000  | -1.754688000 |
| Cl | 0.562846000  | -2.015503000 | -2.664614000 | H | 3.220190000  | 3.222257000  | -1.719337000 |
| C  | 1.667062000  | -3.620496000 | 0.195201000  | H | 0.849006000  | -3.420738000 | 0.886199000  |
| C  | 2.510801000  | -4.788858000 | 0.660670000  | H | 1.262070000  | -3.753923000 | -0.808790000 |
| C  | 4.920755000  | -4.205315000 | -0.038368000 | H | 2.837993000  | -4.626104000 | 1.693577000  |
| C  | 3.724127000  | -5.153198000 | -0.191472000 | H | 1.837038000  | -5.653700000 | 0.695245000  |
| C  | 5.124989000  | -3.192227000 | -1.159949000 | H | 4.035901000  | -6.159356000 | 0.100641000  |
| C  | 3.897977000  | -2.395242000 | -1.561332000 | H | 3.428281000  | -5.227446000 | -1.243998000 |
| C  | 3.537367000  | 2.382366000  | -1.098090000 | H | 5.840772000  | -4.789314000 | 0.051657000  |
| C  | 4.733927000  | 2.743975000  | -0.242773000 | H | 4.826187000  | -3.669066000 | 0.913988000  |
| C  | 4.487979000  | 3.822690000  | 0.822062000  | H | 5.925767000  | -2.508096000 | -0.862557000 |
| C  | 4.399006000  | 3.306390000  | 2.257091000  | H | 5.488567000  | -3.712829000 | -2.054258000 |
| C  | 3.116913000  | 2.590545000  | 2.658237000  | H | 3.193490000  | -2.955781000 | -2.176380000 |
| C  | 2.762108000  | 1.358552000  | 1.844332000  | H | 4.154761000  | -1.492450000 | -2.115707000 |
| Pt | -1.137936000 | 0.240996000  | 1.241450000  | H | -3.630342000 | -0.740735000 | -1.613709000 |
| Te | -1.758327000 | -1.875665000 | -0.027578000 | H | -2.021037000 | -0.740792000 | -2.353670000 |
| Cl | 0.173537000  | -1.250464000 | 2.517272000  | H | -3.215965000 | -2.275244000 | -3.702787000 |
| Cl | -0.562846000 | 2.015503000  | 2.664614000  | H | -2.272859000 | -3.287989000 | -2.645941000 |
| C  | -2.762108000 | -1.358552000 | -1.844332000 | H | -5.253088000 | -2.641098000 | -2.435035000 |
| C  | -3.116913000 | -2.590545000 | -2.658237000 | H | -4.532043000 | -4.152256000 | -2.938918000 |
| C  | -4.399006000 | -3.306390000 | -2.257091000 | H | -5.307630000 | -4.544953000 | -0.782170000 |
| C  | -4.487979000 | -3.822690000 | -0.822062000 | H | -3.583609000 | -4.392421000 | -0.574166000 |
| C  | -4.733927000 | -2.743975000 | 0.242773000  | H | -5.130206000 | -1.843897000 | -0.237009000 |
| C  | -3.537367000 | -2.382366000 | 1.098090000  | H | -5.522670000 | -3.080346000 | 0.925286000  |
| Te | -2.689410000 | 1.742826000  | -0.089688000 | H | -3.737048000 | -1.536795000 | 1.754688000  |
| C  | -3.897977000 | 2.395242000  | 1.561332000  | H | -3.220190000 | -3.222257000 | 1.719337000  |
| C  | -5.124989000 | 3.192227000  | 1.159949000  | H | -4.154761000 | 1.492450000  | 2.115707000  |
| C  | -4.920755000 | 4.205315000  | 0.038368000  | H | -3.193490000 | 2.955781000  | 2.176380000  |
| C  | -3.724127000 | 5.153198000  | 0.191472000  | H | -5.925767000 | 2.508096000  | 0.862557000  |
| C  | -2.510801000 | 4.788858000  | -0.660670000 | H | -5.488567000 | 3.712829000  | 2.054258000  |
| C  | -1.667062000 | 3.620496000  | -0.195201000 | H | -2.837993000 | 4.626104000  | -1.693577000 |
| H  | 2.021037000  | 0.740792000  | 2.353670000  | H | -1.837038000 | 5.653700000  | -0.695245000 |
| H  | 3.630342000  | 0.740735000  | 1.613709000  | H | -1.262070000 | 3.753923000  | 0.808790000  |
| H  | 3.215965000  | 2.275244000  | 3.702787000  | H | -0.849006000 | 3.420738000  | -0.886199000 |
| H  | 2.272859000  | 3.287989000  | 2.645941000  | H | -3.428281000 | 5.227446000  | 1.243998000  |
| H  | 5.253088000  | 2.641098000  | 2.435035000  | H | -4.035901000 | 6.159356000  | -0.100641000 |
| H  | 4.532043000  | 4.152256000  | 2.938918000  | H | -4.826187000 | 3.669066000  | -0.913988000 |
| H  | 5.307630000  | 4.544953000  | 0.782170000  | H | -5.840772000 | 4.789314000  | -0.051657000 |

**Table S4.** PBE0-D3/def2-TZVP optimized geometries of the  $[\text{Pt}_n\text{Cl}_{2n}\{\text{Te}(\text{CH}_2)_6\}_m]$  ( $n = 1-4$ ;  $m = 2-4$ ).

|                                                                                                                                                                                                                                                                                                                                      |                                                                                                                                                                                                                                                                                                                                                         |
|--------------------------------------------------------------------------------------------------------------------------------------------------------------------------------------------------------------------------------------------------------------------------------------------------------------------------------------|---------------------------------------------------------------------------------------------------------------------------------------------------------------------------------------------------------------------------------------------------------------------------------------------------------------------------------------------------------|
| <p><b><i>cis</i>-<math>[\text{PtCl}_2\{\text{Te}(\text{CH}_2)_6\}_2]</math></b></p> 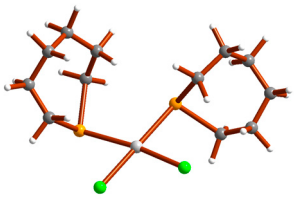 <p>Pt-Te 2.528-2.531<br/>Pt-Cl 2.326-2.339</p>                                                                                                                 | <p><b><i>trans</i>-<math>[\text{PtCl}_2\{\text{Te}(\text{CH}_2)_6\}_2]</math></b></p>  <p>Pt-Te 2.583<br/>Pt-Cl 2.315</p>                                                                                                                                             |
| <p><b><math>[\text{Pt}_2\text{Cl}_4\{\text{Te}(\text{CH}_2)_6\}_3]</math></b></p>  <p>Pt-Te(<i>cis</i>) 2.501-2.543<br/>Pt-Te(<i>trans</i>) 2.565-2.580<br/>Pt-Cl(<i>cis</i>) 2.307-2.339<br/>Pt-Cl(<i>trans</i>) 2.301-2.325<br/>Te...Cl 3.636</p> | <p><b><math>[\text{Pt}_3\text{Cl}_6\{\text{Te}(\text{CH}_2)_6\}_4]</math></b></p>  <p>Pt-Te(<i>cis</i>) 2.515-2.518<br/>Pt-Te(<i>trans</i>) 2.572-2.581<br/>Pt-Cl(<i>cis</i>) 2.316<br/>Pt-Cl(<i>trans</i>) 2.315-2.323<br/>Pt...Pt 3.167<br/>Te...Cl 3.508-3.628</p> |
| <p><b><math>[\text{Pt}_4\text{Cl}_8\{\text{Te}(\text{CH}_2)_6\}_4]</math></b></p>  <p>Pt-Te(<i>cis</i>) 2.510<br/>Pt-Te(<i>trans</i>) 2.561<br/>Pt-Cl(<i>cis</i>) 2.313<br/>Pt-Cl(<i>trans</i>) 2.314<br/>Pt...Pt 3.075<br/>Te...Cl 3.613</p>     |                                                                                                                                                                                                                                                                                                                                                         |

### 3.2 Secondary bonding interactions

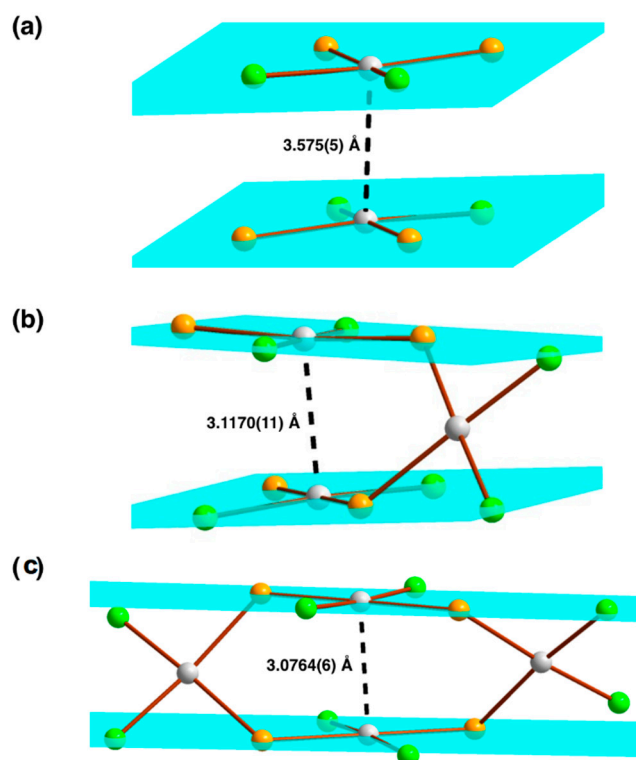

**Figure S4.** The Pt...Pt interactions lead to the square-planar coordination plane to become slightly concave in (a) **1<sub>cis</sub>**, (b) **2**, and (c) **3**.

### 3.3 Formation energetics

**Table S5.** Total energies of optimized species at PBE0-D3/def2-TZVP level of theory in vacuum (Hartree).

| Species                                                                             | $E$         | $H$         | $G_{298}$   |
|-------------------------------------------------------------------------------------|-------------|-------------|-------------|
| <i>cis</i> -[PtCl <sub>2</sub> (NCPH) <sub>2</sub> ]                                | -1688.06795 | -1687.84233 | -1687.91708 |
| <i>trans</i> -[PtCl <sub>2</sub> (NCPH) <sub>2</sub> ]                              | -1688.07709 | -1687.85113 | -1687.92435 |
| PhCN                                                                                | -324.22847  | -324.12182  | -324.15846  |
| Te(CH <sub>2</sub> ) <sub>6</sub>                                                   | -503.70425  | -503.52586  | -503.56845  |
| <i>cis</i> -[PtCl <sub>2</sub> {Te(CH <sub>2</sub> ) <sub>6</sub> }] <sub>2</sub>   | -2047.06703 | -2046.69856 | -2046.77953 |
| <i>trans</i> -[PtCl <sub>2</sub> {Te(CH <sub>2</sub> ) <sub>6</sub> }] <sub>2</sub> | -2047.08132 | -2046.71280 | -2046.79224 |
| [Pt <sub>2</sub> Cl <sub>4</sub> {Te(CH <sub>2</sub> ) <sub>6</sub> }] <sub>3</sub> | -3590.44077 | -3589.88192 | -3589.99880 |
| [Pt <sub>3</sub> Cl <sub>6</sub> {Te(CH <sub>2</sub> ) <sub>6</sub> }] <sub>4</sub> | -5133.82851 | -5133.07979 | -5133.23107 |
| [Pt <sub>4</sub> Cl <sub>8</sub> {Te(CH <sub>2</sub> ) <sub>6</sub> }] <sub>4</sub> | -6173.45186 | -6172.69360 | -6172.85587 |
| [PtCl <sub>2</sub> (NCPH){Te(CH <sub>2</sub> ) <sub>6</sub> }]                      | -1867.57576 | -1867.27869 | -1867.35713 |

**Table S6.** Total energies of optimized species at PBE0-D3/def2-TZVP level of theory in dichloromethane (Hartree).

|                                                                                     | $E$         | $H$         | $G_{298}$   |
|-------------------------------------------------------------------------------------|-------------|-------------|-------------|
| <i>cis</i> -[PtCl <sub>2</sub> (NCPH) <sub>2</sub> ]                                | -1688.09774 | -1687.87197 | -1687.94624 |
| <i>trans</i> -[PtCl <sub>2</sub> (NCPH) <sub>2</sub> ]                              | -1688.10200 | -1687.87599 | -1687.94883 |
| PhCN                                                                                | -324.23565  | -324.12893  | -324.16554  |
| Te(CH <sub>2</sub> ) <sub>6</sub>                                                   | -503.70723  | -503.52904  | -503.57170  |
| <i>cis</i> -[PtCl <sub>2</sub> {Te(CH <sub>2</sub> ) <sub>6</sub> }] <sub>2</sub>   | -2047.09060 | -2046.72240 | -2046.80539 |
| <i>trans</i> -[PtCl <sub>2</sub> {Te(CH <sub>2</sub> ) <sub>6</sub> }] <sub>2</sub> | -2047.09323 | -2046.72499 | -2046.80445 |
| [Pt <sub>2</sub> Cl <sub>4</sub> {Te(CH <sub>2</sub> ) <sub>6</sub> }] <sub>3</sub> | -3590.46723 | -3589.90901 | -3590.02745 |
| [Pt <sub>3</sub> Cl <sub>6</sub> {Te(CH <sub>2</sub> ) <sub>6</sub> }] <sub>4</sub> | -5133.85842 | -5133.11156 | -5133.26138 |
| [Pt <sub>4</sub> Cl <sub>8</sub> {Te(CH <sub>2</sub> ) <sub>6</sub> }] <sub>4</sub> | -6173.49395 | -6172.73679 | -6172.90005 |
| [PtCl <sub>2</sub> (NCPH){Te(CH <sub>2</sub> ) <sub>6</sub> }]                      | -1867.59427 | -1867.29725 | -1867.37482 |

**Table S7.** Gibbs PBE0-D3/def2-TZVP formation energies of **1<sub>cis</sub>**, **1<sub>trans</sub>**, **2**, and **3** from *cis*-[PtCl<sub>2</sub>(NCPH)<sub>2</sub>] and Te(CH<sub>2</sub>)<sub>6</sub>. In dichloromethane (kJ mol<sup>-1</sup>)-

| Reaction                                                                                                                                                                                                                                  | $\Delta E$ | $\Delta H$ | $\Delta G_{298}$ | $\Delta G/\text{Pt}$ | $\Delta G/\text{Te}$ |
|-------------------------------------------------------------------------------------------------------------------------------------------------------------------------------------------------------------------------------------------|------------|------------|------------------|----------------------|----------------------|
| <i>cis</i> -[PtCl <sub>2</sub> (NCPH) <sub>2</sub> ] + 2 Te(CH <sub>2</sub> ) <sub>6</sub> $\rightleftharpoons$ <i>cis</i> -[PtCl <sub>2</sub> {Te(CH <sub>2</sub> ) <sub>6</sub> }] <sub>2</sub> ( <b>1<sub>cis</sub></b> ) + 2 PhCN     | -130       | -132       | -123             | -123                 | -61                  |
| <i>cis</i> -[PtCl <sub>2</sub> (NCPH) <sub>2</sub> ] + 2 Te(CH <sub>2</sub> ) <sub>6</sub> $\rightleftharpoons$ <i>trans</i> -[PtCl <sub>2</sub> {Te(CH <sub>2</sub> ) <sub>6</sub> }] <sub>2</sub> ( <b>1<sub>trans</sub></b> ) + 2 PhCN | -137       | -139       | -121             | -121                 | -60                  |
| 2 <i>cis</i> -[PtCl <sub>2</sub> (NCPH) <sub>2</sub> ] + 3 Te(CH <sub>2</sub> ) <sub>6</sub> $\rightleftharpoons$ [Pt <sub>2</sub> Cl <sub>4</sub> {Te(CH <sub>2</sub> ) <sub>6</sub> }] <sub>3</sub> + 4 PhCN                            | -243       | -246       | -215             | -107                 | -71                  |
| 3 <i>cis</i> -[PtCl <sub>2</sub> (NCPH) <sub>2</sub> ] + 4 Te(CH <sub>2</sub> ) <sub>6</sub> $\rightleftharpoons$ [Pt <sub>3</sub> Cl <sub>6</sub> {Te(CH <sub>2</sub> ) <sub>6</sub> }] <sub>4</sub> ( <b>2</b> ) + 6 PhCN               | -394       | -402       | -339             | -113                 | -85                  |
| 4 <i>cis</i> -[PtCl <sub>2</sub> (NCPH) <sub>2</sub> ] + 4 Te(CH <sub>2</sub> ) <sub>6</sub> $\rightleftharpoons$ [Pt <sub>4</sub> Cl <sub>8</sub> {Te(CH <sub>2</sub> ) <sub>6</sub> }] <sub>4</sub> ( <b>3</b> ) + 8 PhCN               | -418       | -431       | -401             | -100                 | -100                 |

#### 4. References

- [1] Rodewald, M.; Rautiainen, J. M.; Niksch, T.; Görls, H.; Oilunkaniemi, R.; Weigand, W.; Laitinen, R. S. Chalcogen-bonding interactions in telluroether heterocycles  $[\text{Te}(\text{CH}_2)_m]_n$  ( $n = 1-4$ ;  $m = 3-7$ ). *Chem. Eur. J.* **2020**, *26*, 13806- 13818. doi.org/10.1002/chem.202002510
